# Supplementary material
Source: publisher figshare collection journal article supplement (https://karger.figshare.com/ndownloader/files/23167334)
Supplement: Supplementary file 1 [file 23167334]

Supplement online 4: Outcomes in occlusions with low clot burden

mRS: modified Rankin Scale; mTICI: modified thrombolysis in cerebral infarction; SD: standard deviation

|  | Unadjusted Analysis | | | PS-Matched Analysis | | |
| --- | --- | --- | --- | --- | --- | --- |
|  | Short  n= 190 | Long  n= 49 | P-Value | Short  n= 238 | Long  n= 257 | P-Value |
| **Primary outcome** | | | | | | |
| First-pass reperfusion | | | | | | |
| mTICI 3 | 50  (26.3%) | 13  (26.5%) | 0.976 | 64  (26.9%) | 44  (17.1%) | 0.009 |
| mTICI ≥2b | 81  (42.6%) | 19  (38.8%) | 0.626 | 101  (42.4%) | 78  (30.4%) | 0.005 |
| **Secondary outcome** | | | | | | |
| Final reperfusion | | | | | | |
| mTICI ≥2b | 160  (84.2%) | 43  (87.8%) | 0.536 | 200  (84.0%) | 237  (92.2%) | 0.005 |
| mTICI 3 | 77  (40.5%) | 23  (46.9%) | 0.417 | 95  (39.9%) | 111  (43.2%) | 0.460 |
| Number of passes, mean ± SD | 2.9 ± 2.3 | 3.0 ± 2.5 | 0.440 | 2.9 ± 2.3 | 3.1 ± 2.3 | 0.325 |
| Groin puncture – reperfusion (minutes), mean ± SD | 65.2 ± 45.2 | 70.7 ± 50.8 | 0.616 | 66.4 ± 43.1 | 71.8 ± 50.3 | 0.201 |
| Subarachnoid hemorrhage | 17  (8.9%) | 6  (12.2%) | 0.485 | 23  (9.7%) | 52  (20.2%) | 0.001 |
| **Clinical Outcome** | | | | | | |
| mRS score ≤ 2 at discharge | 47  (24.7%) | 7  (14.3%) | 0.118 | 57  (23.9%) | 26  (10.1%) | <0.001 |
| mRS score ≤ 2 at 90 days | 65/176  (36.9%) | 10/43  (23.3%) | 0.09 | 78/220  (35.5%) | 53/239  (22.2%) | 0.002 |
